# Supplementary material for: A European International Multicentre Survey on the Current Practice of Perioperative Antibiotic Prophylaxis for Paediatric Liver Transplantations
Source: MDPI journal article supplement (doi:10.3390/antibiotics12020292), 2023-02-01
Supplement: s1 [file s1]

**Supplementary Table S1.** Duration and type of antibiotic prophylaxis according to the number of annual transplantations.

|                                               |                 | <b>Annual transplantations</b> |                |
|-----------------------------------------------|-----------------|--------------------------------|----------------|
|                                               |                 | <b>≤ 20</b>                    | <b>&gt; 20</b> |
| No. of centres                                |                 | 11 (55 %)                      | 9 (45 %)       |
| Standard duration of treatment                | 24-48 hours     | 3 (27 %)                       | 3 (33 %)       |
|                                               | 3-5 days        | 3 (27 %)                       | 3 (33 %)       |
|                                               | 6-10 days       | 1 (9 %)                        | 2 (22 %)       |
|                                               | Single shot     | 1 (9 %)                        | 0 (0 %)        |
|                                               | No standard     | 3 (27 %)                       | 1 (11 %)       |
| Type of standard prophylaxis                  | Narrow spectrum | 7 (64 %)                       | 3 (33 %)       |
|                                               | Broad spectrum  | 4 (36 %)                       | 6 (66 %)       |
| Availability of infectious disease specialist |                 | 10 (91 %)                      | 6 (66 %)       |

**Supplementary Table S2.** Infection surveillance strategies and non-antibiotic anti-infective measures.

| <b>Surveillance strategies</b>  | <b>n (%)</b> |
|---------------------------------|--------------|
| Ascites                         | 11 (61%)     |
| Blood                           | 9 (50%)      |
| Urine                           | 9 (50%)      |
| Tracheal secrete                | 11 (61%)     |
| Skin swabs                      | 4 (22%)      |
| Rectal swabs                    | 13 (72%)     |
| Nose swabs                      | 2 (11%)      |
| Throat swabs                    | 7 (39%)      |
| Wound swabs                     | 1 (6%)       |
| Preservation fluid of the graft | 10 (56%)     |
| All drain fluids                | 1 (6%)       |
| <b>Biomarker</b>                |              |
| CRP                             | 19 (95%)     |
| Procalcitonin                   | 13 (65%)     |
| Leukocyte count                 | 12 (60%)     |
| Interleukin 6                   | 2 (10%)      |
| CRP                             | 19 (95%)     |
| <b>Anti-infective measures</b>  |              |
| <b>Isolation</b>                |              |
| 1 week                          | 1 (5%)       |
| 2-3 weeks                       | 1 (5%)       |
| Until discharge                 | 2 (10%)      |

|                                                                     |           |
|---------------------------------------------------------------------|-----------|
| Until discontinuation and normalisation of CRP and<br>Procalcitonin | 1 (5%)    |
| No                                                                  | 14 (70%)  |
| <b>Other prophylactic measures</b>                                  |           |
| Chlorhexidine dressing                                              | 8 (40%)   |
| Octenidine washing                                                  | 4 (20%)   |
| Selective bowel decontamination                                     | 1 (5%)    |
| Probiotics                                                          | 1 (5%)    |
| Silver nitrate or antibiotic-impregnated central catheter           | 1 (5%)    |
| No standard                                                         | 2 (10%)   |
| <b>Antifungal prophylaxis in the absence of risk factors</b>        | 12 (60%)  |
| <b>Agent</b>                                                        |           |
| Fluconazole                                                         | 4 (20%)   |
| Liposomal amphotericin b                                            | 1 (5%)    |
| Micafungin                                                          | 2 (10%)   |
| Caspofungin                                                         | 1 (5%)    |
| Total                                                               | 20 (100%) |
| <b>Duration of prophylaxis</b>                                      |           |
| 3-7 days                                                            | 12 (60%)  |
| 14-28 days                                                          | 2 (10%)   |
| > 28 days                                                           | 1 (5%)    |
| No fungal prophylaxis                                               | 5 (25%)   |
| Total                                                               | 20 (100%) |
| <b>Additional risk factors triggering antifungal prophylaxis</b>    |           |
| Antibiotic pre-treatment                                            | 2 (14%)   |
| Pre-existing conditions                                             | 5 (33%)   |
| Positive fungal cultures                                            | 12 (80%)  |
| Intraabdominal patch                                                | 5 (33%)   |
| Reoperations                                                        | 7 (47%)   |
| Massive blood transfusion                                           | 3 (20%)   |
| Course of CrP                                                       | 5 (33%)   |
| Course of procalcitonin                                             | 3 (20%)   |
| Acute liver failure                                                 | 1 (7%)    |
| Length of hospital stay                                             | 1 (7%)    |
| Total                                                               | 15 (100%) |
| <b>Antiviral prophylaxis</b>                                        |           |
| <b>Agent</b>                                                        |           |
| Gancicovir                                                          | 7 (35%)   |
| Aciclovir                                                           | 7 (35%)   |
| Aciclovir or Ganciclovir                                            | 1 (5%)    |
| Unspecific immunoglobulins                                          | 1 (5%)    |
| Pre-emptive therapy in case of viraemia or symptoms                 | 3 (15%)   |
| Total                                                               | 20 (100%) |
| <b>Risk constellation</b>                                           |           |
| All patients                                                        | 7 (41%)   |
| CMV+donor                                                           | 4 (24%)   |
| CMV+recipient                                                       | 3 (18%)   |
| Mismatch (CMV-recipient)                                            | 2 (12%)   |
| Recipient age under one year                                        | 1 (6%)    |
| Total                                                               | 17 (100%) |

CrP = c-reactive protein; CMV+/- = cytomegalia virus positive/negative

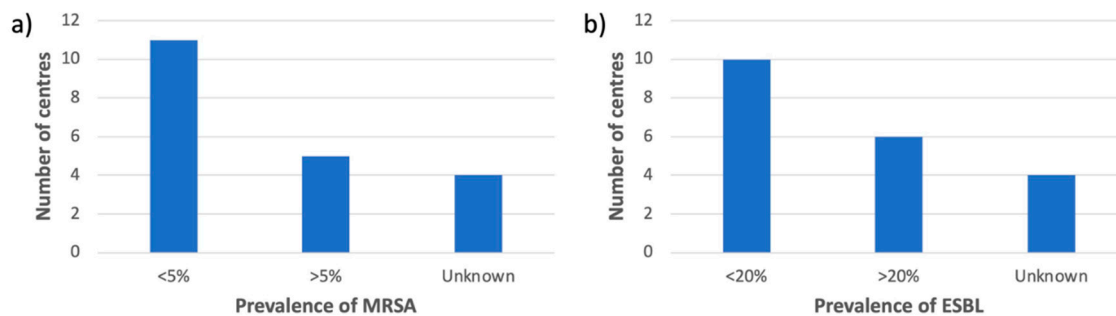

**Supplementary Figure S1.** Prevalence of multidrug resistant bacteria in participating paediatric liver transplantation centres. (a) Methicillin-resistant *staphylococcus aureus*. (b) Extended-spectrum  $\beta$ -lactamase.

Questionnaire:

1. Please mark your region in Europe.

- Central Europe
- Northern Europe
- Southern Europe
- Western Europe
- Eastern Europe

2. Please indicate the average number of paediatric liver transplantation per year at your hospital.

- <5
- 5-10
- 11-20
- 21-30
- >30

3. Please indicate the average number of high urgency transplantations

- <3
- 3-5
- >5

4. Please indicate the average number of living related liver transplantations per year

- <5
- 5-10
- 11-15
- 16-20

- >20

5. Is the prevalence of MRSA known? Can you specify please?

- <5%
- 5-10%
- 10-20%
- 20-30%
- >30%
- unknown

6. Is the prevalence of ESBL/Extended spectrum  $\beta$ -lactamases known? Can you please specify?

- <5%
- 5-10%
- 10-20%
- 20-30%
- >30%
- unknown

7. Are you using any of the mentioned anti-infective or antiseptic measures routinely in pediatric liver transplant patients (several answers can be chosen)?

- Chlorhexidine dressing
- Octenidine washing
- Selective bowel decontamination
- Silver nitrate or antibiotic impregnated central catheters
- Probiotics
- other: \_\_\_\_\_

8. Infectious management/work-up of perioperative anti-infective measures is determined by...(several answers can be chosen)

- Surgeon
- Paediatric surgeon
- Gastroenterologist
- Paediatric gastroenterologist
- Intensive care specialist
- Paediatric intensive care specialist
- Anaesthetist
- Paediatric anaesthetist
- Infectious disease specialist
- Paediatric infectious disease specialist
- other: \_\_\_\_\_

9. Which unit is in charge of the postoperative care? (several answers can be chosen)

- Paediatric intensive care unit
- Adult intensive care unit
- Mixed intensive care unit
- other: \_\_\_\_\_

10. Do you provide a basiliximab based immunosuppression?

- Yes
- No

11. Which is your standard immunosuppression regimen in the first three weeks?

- Steroids plus tacrolimus plus mycophenolic mofetil
- Steroids plus cyclosporine plus mycophenolic mofetil
- Steroids plus tacrolimus
- Steroids plus cyclosporine
- Steroids plus mycophenolic mofetil
- Tacrolimus plus mycophenolic mofetil
- Cyclosporine plus mycophenolic mofetil
- Steroids alone
- Tacrolimus alone
- Cyclosporine alone
- Other regimen: \_\_\_\_\_

12. The target trough level of Tacrolimus in the first week is:

- <8 µg/l
- 8-12 µg/l
- 12-16 µg/l
- >16 µg/l

13. The target of the Cyclosporin A trough level in the first week is:

- <225 µg/l
- 225-300 µg/l
- >300 µg/l

14. Which is the preferred initial steroid?

- Prednisolone
- Methylprednisolone
- Dexamethasone
- Other: \_\_\_\_\_

15. What is the initial daily steroid dosage?

- \_\_\_\_\_ mg
- \_\_\_\_\_ mg/kg
- \_\_\_\_\_ mg/m<sup>2</sup>

16. Which antibiotic regimen is used as perioperative standard?

- Aminopenicillin
- Aminopenicillin + β-lactamase inhibitor
- Ureidopenicillin + β-lactamase inhibitor
- Carboxypenicillin

- Cephalosporin 1st generation
- Cephalosporin 2nd generation
- Cephalosporin 3rd generation
- Cephalosporin 4th generation
- Carbapenem
- Metronidazole
- Fluoroquinolone
- others: \_\_\_\_\_

17. Is there a standard duration of the perioperative antibiotic prophylaxis?

- no
- single shot
- 24-48 hours
- 3-5 days
- 6-10 days
- >10 days

18. If not, which factors influence the duration of antibiotic prophylaxis? (several answers can be chosen)

- Antibiotic pre-treatment
- Pre-existing conditions, e. g. cachexia, ascites
- Known colonization of multi-resistant bacteria
- Age
- Intra-abdominal patch
- Course of C-reactive protein
- Course of procalcitonin
- Donor-specific risk factors, e.g., length of hospital stay
- Ascites after transplantation
- Presence of abdominal patch
- Presence of central venous catheter
- split organ
- other: \_\_\_\_\_

19. Is there a standard duration of the antibiotic therapy after considering the risk factors?

- no
- single shot
- 24-48 hours
- 3-5 days
- 6-10 days
- >10 days

20. Which is your standard escalation antibiotic therapy in case of suspected infection under prophylaxis (several answers can be chosen)?

- Carbapenem
- Ureidopenicillin +  $\beta$ -lactamase inhibitor
- Cephalosporine 3rd generation
- Cephalosporine 4th generation

- Aminoglycoside
- Fluoroquinolone
- Vancomycin
- Linezolid
- Colistin
- Metronidazole
- other: \_\_\_\_\_

21. Do you use a standard anti-fungal peri-operative prophylaxis?

- no
- Fluconazole
- Posaconazole
- Voriconazole
- Liposomal amphotericin b
- Caspofungin
- other: \_\_\_\_\_

22. If you do not use an anti-fungal prophylaxis, are there risk factors that lead to anti-fungal prophylaxis on an individual basis? (several answers can be chosen)

- Antibiotic pre-treatment
- Pre-existing conditions
- Positive fungal cultures (colonisation)
- Donor-specific risk factors, e.g., length of hospital stay
- Age
- Intra-abdominal patch
- Re-operation
- Massive blood transfusion
- Course of C-reactive Protein
- Course of procalcitonin
- other: \_\_\_\_\_

23. If you use an anti-fungal prophylaxis, how long do you administer it?

- we do not use an anti-fungal prophylaxis
- 24-48 hours
- 3-7 days
- 14-28 days
- >28 days

24. Which are preferred biomarker to monitor bacterial infection? (several answers can be chosen).

- C-reactive Protein
- Procalcitonin
- Interleukin 6
- Interleukin 8
- Leukocyte count
- other: \_\_\_\_\_

25. Do you isolate your patient after the transplantation?

- no
- yes, period of time: \_\_\_\_\_

26. Do you use standardized surveillance strategies? (several answers can be chosen)

- no
- ascites
- tracheal secrete
- blood
- urine
- skin swabs
- rectal swabs
- preservation fluid of the graft
- nose swabs
- throat swabs
- other: \_\_\_\_\_

27. What is your standard antiviral regimen?

- Aciclovir prophylaxis
- Ganciclovir prophylaxis
- Pre-emptive therapy in case of viraemia
- We do not use a standard antiviral regimen.
- other: \_\_\_\_\_

28. The standard CMV prophylaxis is for:

- all patients
- both CMV positive
- recipient positive
- donor positive
- both negative

29. Do you want to add something? \_\_\_\_\_

30. If you want, you can name your hospital here. \_\_\_\_\_
